# Supplementary material for: Phosphate accumulation in rice leaves promotes fungal pathogenicity and represses host immune responses during pathogen infection
Source: Front Plant Sci. 2024 Jan 17;14:1330349. doi: 10.3389/fpls.2023.1330349 (PMC10827867; doi:10.3389/fpls.2023.1330349)
Supplement: Supplementary file 3 [file Table_2.xlsx]

## Sheet: Supl Table 2
	Supplementary Table 2. List of Pi transporters identified in the M. oryzae genome.
	TCDB Group	TCDB Subgroup	Gene	NCBI Description	NCBI Accession	CATH-Gene 3D	GO Terms	InterPro	KOG Terms	PANTHER	PROSITE
	The Major Facilitator Subfamily (MFS) (2.A.1.), The Phosphate: H+ Symporter (PHS) Family (2.A.1.9)	2.A.1.9.1	MGG_05722	uncharacterized protein	XP_003710629.1	MFS general substrate transporter like domains (1.20.1250.20)	integral component of membrane (GO:0016021)	Major facilitator superfamily domain (IPR020846)	Inorganic phosphate transporter (KOG0252)	INORGANIC PHOSPHATE TRANSPORTER PHO84 (PTHR24064:SF616)	Major facilitator superfamily (MFS) profile (PS50850)
							transmembrane transporter activity (GO:0022857)	Major facilitator, sugar transporter-like (IPR005828)		SOLUTE CARRIER FAMILY 22 MEMBER (PTHR24064)	Sugar transport proteins signature 2 (PS00217)
							transmembrane transport (GO:0055085)	MFS transporter superfamily (IPR036259)
								Sugar transporter, conserved site (IPR005829)
			MGG_10287	metabolite transporter	XP_003720550.1	MFS general substrate transporter like domains (1.20.1250.20)	integral component of membrane (GO:0016021)	Major facilitator superfamily domain (IPR020846)	Inorganic phosphate transporter (KOG0252)	CARBOXYLIC ACID TRANSPORTER PROTEIN HOMOLOG (PTHR23508)	Major facilitator superfamily (MFS) profile (PS50850)
							transmembrane transporter activity (GO:0022857)	Major facilitator, sugar transporter-like (IPR005828)		CARBOXYLIC ACID TRANSPORTER PROTEIN HOMOLOG (PTHR23508:SF10)	Sugar transport proteins signature 2 (PS00217)
							transmembrane transport (GO:0055085)	MFS transporter superfamily (IPR036259)
								Sugar transporter, conserved site (IPR005829)
		2.A.1.9.2	MGG_01439	inorganic phosphate transporter PHO84	XP_003714390.1	MFS general substrate transporter like domains (1.20.1250.20)	inorganic phosphate transmembrane transporter activity (GO:0005315)	Major facilitator superfamily domain (IPR020846)	Inorganic phosphate transporter (KOG0252)	INORGANIC PHOSPHATE TRANSPORTER PHO84 (PTHR24064:SF616)	Major facilitator superfamily (MFS) profile (PS50850)
							phosphate ion transport (GO:0006817)	Major facilitator, sugar transporter-like (IPR005828)		SOLUTE CARRIER FAMILY 22 MEMBER (PTHR24064)	Sugar transport proteins signature 2 (PS00217)
							integral component of membrane (GO:0016021)	MFS transporter superfamily (IPR036259)
							transmembrane transporter activity (GO:0022857)	Phosphate permease (IPR004738)
							transmembrane transport (GO:0055085)	Sugar transporter, conserved site (IPR005829)
			MGG_03299	phosphate:H+ symporter	XP_003716663.1	MFS general substrate transporter like domains (1.20.1250.20)	inorganic phosphate transmembrane treansporter activity (GO:0005315)	Major facilitator superfamily domain (IPR020846)	Inorganic phosphate transporter (KOG0252)	INORGANIC PHOSPHATE TRANSPORTER PHO84 (PTHR24064:SF616)	Major facilitator superfamily (MFS) profile (PS50850)
							phosphate ion transport (GO:0006817)	Major facilitator, sugar transporter-like (IPR005828)		SOLUTE CARRIER FAMILY 22 MEMBER (PTHR24064)	Sugar transport proteins signature 2 (PS00217)
							integral component of membrane (GO:0016021)	MFS transporter superfamily (IPR036259)
							transmembrane transporter activity (GO:0022857)	Phosphate permease (IPR004738)
							transmembrane transport (GO:0055085)	Sugar transporter, conserved site (IPR005829)
		2.A.1.9.4	MGG_07980	metabolite transporter	XP_003713226.1	MFS general substrate transporter like domains (1.20.1250.20)	integral component of membrane (GO:0016021)	Major facilitator superfamily domain (IPR020846)	Inorganic phosphate transporter (KOG0252)	CARBOXYLIC ACID TRANSPORTER PROTEIN HOMOLOG (PTHR23508)	Major facilitator superfamily (MFS) profile (PS50850)
							transmembrane transporter activity (GO:0022857)	Major facilitator, sugar transporter-like (IPR005828)		CARBOXYLIC ACID TRANSPORTER PROTEIN HOMOLOG (PTHR23508:SF10)	Sugar transport proteins signature 1 (PS00216)
							transmembrane transport (GO:0055085)	MFS transporter superfamily (IPR036259)
								Sugar transporter, conserved site (IPR005829)
			MGG_00464	MFS phospholipid transporter Git1	XP_003718601.1	MFS general substrate transporter like domains (1.20.1250.20)	integral component of membrane (GO:0016021)	Major facilitator superfamily domain (IPR020846)	Inorganic phosphate transporter (KOG0252)	CARBOXYLIC ACID TRANSPORTER PROTEIN HOMOLOG (PTHR23508)	Major facilitator superfamily (MFS) profile (PS50850)
							transmembrane transporter activity (GO:0022857)	Major facilitator, sugar transporter-like (IPR005828)		CARBOXYLIC ACID TRANSPORTER PROTEIN HOMOLOG (PTHR23508:SF10)
							transmembrane transport (GO:0055085)	MFS transporter superfamily (IPR036259)
		2.A.1.9.5	MGG_00346	pi-transporter A-1	XP_003718737.1	MFS general substrate transporter like domains (1.20.1250.20)	integral component of membrane (GO:0016021)	Major facilitator superfamily domain (IPR020846)	Inorganic phosphate transporter (KOG0252)	PHOSPHATE TRANSPORTER, PUTATIVE (AFU_ORTHOLOGUE AFUA_2G10690)-RELATED (PTHR24064:SF235)	Major facilitator superfamily (MFS) profile (PS50850)
							transmembrane transporter activity (GO:0022857)	Major facilitator, sugar transporter-like (IPR005828)		SOLUTE CARRIER FAMILY 22 MEMBER (PTHR24064)
							transmembrane transport (GO:0055085)	MFS transporter superfamily (IPR036259)
	The Inorganic Phosphate Transporter (PiT) Family (2.A.20)	2.A.20.2.1	MGG_07966	phosphate transporter	XP_003713212.1	No significant hits	inorganic phosphate transmembrane transporter activity (GO:0005315)	Phosphate transporter (IPR001204)	Na+/Pi symporter (KOG2493)	PHOSPHATE TRANSPORTER (PTHR11101)	No significant hits
										PHOSPHATE TRANSPORTER (PTHR11101:SF55)
			MGG_03348	phosphate-repressible phosphate permease	XP_003716604.1	No significant hits	inorganic phosphate transmembrane transporter activity (GO:0005315)	Phosphate transporter (IPR001204)	Na+/Pi symporter (KOG2493)	PHOSPHATE TRANSPORTER (PTHR11101)	No significant hits
										PHOSPHATE TRANSPORTER (PTHR11101:SF55)
			MGG_04251	sodium/phosphate symporter	XP_003719560.1	No significant hits	inorganic phosphate transmembrane transporter activity (GO:0005315)	Phosphate transporter (IPR001204)	Na+/Pi symporter (KOG2493)	PHOSPHATE TRANSPORTER (PTHR11101)	No significant hits
										PHOSPHATE TRANSPORTER (PTHR11101:SF55)
	The Mitochondrial Carrier (MC) Family (2.A.29)	2.A.29.4.3	MGG_02370	mitochondrial phosphate carrier protein	XP_003709139.1	Mitochondrial carrier domain (1.50.40.10)	inorganic phosphate transmembrane transporter activity (GO:0005315)	Mitochondrial carrier protein (IPR002067)	Mitochondrial phosphate carrier protein (KOG0767)	MITOCHONDRIAL PHOSPHATE CARRIER PROTEIN (PTHR45671:SF12)	Solute carrier (Solcar) repeat profile (PS50920)
							mitocondrial phosphate ion transmembrane transport (GO:1990547)	Mitochondrial substrate/solute carrier (IPR018108)		SOLUTE CARRIER FAMILY 25 (MITOCHONDRIAL CARRIER PHOSPHATE CARRIER), MEMBER 3, LIKE-RELATED-RELATED (PTHR45671)
								Mitochondrial carrier domain superfamily (IPR023395)
								Mitochondrial phosphate carrier protein SLC25A3/Pic2/Mir1-like (IPR044677)
			MGG_07489	mitochondrial phosphate carrier protein	XP_003711398.1	Mitochondrial carrier domain (1.50.40.10)	inorganic phosphate transmembrane transporter activity (GO:0005315)	Mitochondrial substrate/solute carrier (IPR018108)	Mitochondrial phosphate carrier protein (KOG0767)	MITOCHONDRIAL PHOSPHATE CARRIER PROTEIN (PTHR45671:SF12)	Solute carrier (Solcar) repeat profile (PS50920)
							mitocondrial phosphate ion transmembrane transport (GO:1990547)	Mitochondrial carrier domain superfamily (IPR023395)		SOLUTE CARRIER FAMILY 25 (MITOCHONDRIAL CARRIER PHOSPHATE CARRIER), MEMBER 3, LIKE-RELATED-RELATED (PTHR45671)
								Mitochondrial phosphate carrier protein SLC25A3/Pic2/Mir1-like (IPR044677)
			MGG_13428	mitochondrial phosphate carrier protein	XP_003711518.1	Mitochondrial carrier domain (1.50.40.10)	inorganic phosphate transmembrane transporter activity (GO:0005315)	Mitochondrial carrier protein (IPR002067)	Mitochondrial phosphate carrier protein (KOG0767)	CHROMOSOME 1, WHOLE GENOME SHOTGUN SEQUENCE (PTHR45671:SF15)	Solute carrier (Solcar) repeat profile (PS50920)
							mitocondrial phosphate ion transmembrane transport (GO:1990547)	Mitochondrial substrate/solute carrier (IPR018108)		SOLUTE CARRIER FAMILY 25 (MITOCHONDRIAL CARRIER PHOSPHATE CARRIER), MEMBER 3, LIKE-RELATED-RELATED (PTHR45671)
								Mitochondrial carrier domain superfamily (IPR023395)
								Mitochondrial phosphate carrier protein SLC25A3/Pic2/Mir1-like (IPR044677)
		2.A.29.4.4	MGG_09906	mitochondrial phosphate carrier protein 2	XP_003710002.1	Mitochondrial carrier domain (1.50.40.10)	inorganic phosphate transmembrane transporter activity (GO:0005315)	Mitochondrial substrate/solute carrier (IPR018108)	Mitochondrial phosphate carrier protein (KOG0767)	PHOSPHATE CARRIER PROTEIN, MITOCHONDRIAL (PTHR45671:SF10)	Solute carrier (Solcar) repeat profile (PS50920)
							copper ion transmembrane transporter activity (GO:0005375)	Mitochondrial carrier domain superfamily (IPR023395)		SOLUTE CARRIER FAMILY 25 (MITOCHONDRIAL CARRIER PHOSPHATE CARRIER), MEMBER 3, LIKE-RELATED-RELATED (PTHR45671)
							cellular copper ion homeostasis (GO:0006878)	Mitochondrial phosphate carrier protein SLC25A3/Pic2/Mir1-like (IPR044677)
	The Divalent Anion:Na+ Symporter (DASS) Family (2.A.47)	2.A.47.2.2	MGG_01050	SPX domain-containing protein	XP_003717889.1	No significant hits	transporter activity (GO:0005215)	Solute carrier family 13 (IPR001898)	Na+/dicarboxylate, Na+/tricarboxylate and phosphate transporters (KOG1281)	LOW-AFFINITY PHOSPHATE TRANSPORTER PHO91 (PTHR10283:SF92)	SPX domain profile (PS51382)
							sodium ion transport (GO:0006814)	SPX domain (IPR004331)		SOLUTE CARRIER FAMILY 13 MEMBER (PTHR10283)
	The Phosphate Permease (Pho1) Family (2.A.94)	2.A.94.1.1	MGG_13413	uncharacterized protein	XP_003711457.1	No significant hits	integral component of membrane (GO:0016021)	CAP Gly-rich domain (IPR000938)	Predicted small molecule transporter (KOG1161)	XENOTROPIC AND POLYTROPIC RETROVIRUS RECEPTOR 1 (PTHR10783:SF103)	CAP-Gly domain profile (PS50245)
								EXS, C-terminal (IPR004342)		XENOTROPIC AND POLYTROPIC RETROVIRUS RECEPTOR 1-RELATED (PTHR10783)	EXS domain profile (PS51380)
								SPX domain (IPR004331)			SPX domain profile (PS51382)
